# Supplementary material for: A fucoidan from sea cucumber Pearsonothuria graeffei with well-repeated structure alleviates gut microbiota dysbiosis and metabolic syndromes in HFD-fed mice
Source: Royal Society of Chemistry journal article supplement (doi:10.1039/c8fo01174e), 2018-01-01
Supplement: c8fo01174e1.pdf [file c8fo01174e1.pdf]

**Supplementary Table1. The Formula of 60% HFD**

| Ingredient                            | gm     | kcal  |
|---------------------------------------|--------|-------|
| Casein, 80 Mesh                       | 200    | 800   |
| L-Cystine                             | 3      | 12    |
| Maltodextrin 10                       | 125    | 500   |
| Sucrose                               | 68.8   | 275.2 |
| Cellulose, BW200                      | 50     | 0     |
| Soybean Oil                           | 25     | 225   |
| Lard                                  | 245    | 2205  |
| Mineral Mix, S10026                   | 10     | 0     |
| DiCalcium Phosphate                   | 13     | 0     |
| Calcium Carbonate                     | 5.5    | 0     |
| Potassium Citrate, 1 H <sub>2</sub> O | 16.5   | 0     |
| Vitamin Mix, V10001                   | 10     | 40    |
| Choline Bitartrate                    | 2      | 0     |
| FD&C Blue Dye #1                      | 0.05   | 0     |
| Total                                 | 773.85 | 4057  |

**Supplementary Table.2 Diversity and richness of cecal microbiota in control mice, HFD-fed, and fuc-Pg -treated mice**

| Groups  | Reads      | OTUs                 | Q30        | Chao1                | Shannon indices        | Simpson indices |
|---------|------------|----------------------|------------|----------------------|------------------------|-----------------|
| Control | 52879±7451 | 1085±81*             | 92.88±0.05 | 1348±80*             | 7.65±0.21*             | 0.978±0.009     |
| HFD     | 43506±9954 | 682±72 <sup>#</sup>  | 92.57±0.11 | 857±94 <sup>#</sup>  | 5.93±0.41 <sup>#</sup> | 0.938±0.012     |
| fuc-Pg  | 35941±4864 | 672±103 <sup>#</sup> | 92.70±0.14 | 858±130 <sup>#</sup> | 6.25±0.43 <sup>#</sup> | 0.95±0.018      |

\*P < 0.05: compared with HFD group. <sup>#</sup> P < 0.05: compared to normal control group. Data are presented as mean ± SD, n = 5. The control group was supplied with common commercial chow and all the other groups were supplied with HFD.

**Supplementary Table.3 Diversity and richness of colonic microbiota in control mice, HFD-fed, and fuc-Pg -treated mice**

| Groups  | Reads      | OTUs                | Q30        | Chao1                | Shannon indices        | Simpson indices |
|---------|------------|---------------------|------------|----------------------|------------------------|-----------------|
| Control | 35602±6652 | 907±175*            | 92.55±0.22 | 1109±195*            | 7.4±0.39*              | 0.98±0.006      |
| HFD     | 43383±4168 | 765±40 <sup>#</sup> | 92.13±0.46 | 975±77 <sup>#</sup>  | 6.34±0.39 <sup>#</sup> | 0.95±0.015      |
| fuc-Pg  | 34446±7942 | 554±89 <sup>#</sup> | 91.72±0.37 | 717±117 <sup>#</sup> | 6.28±0.72 <sup>#</sup> | 0.96±0.034      |

\*P < 0.05: compared with HFD group. <sup>#</sup> P < 0.05: compared to normal control group. Data are presented as mean ± SD, n = 5. The control group was supplied with common commercial chow and all the other groups were supplied with HFD.

Supplementary Fig.1

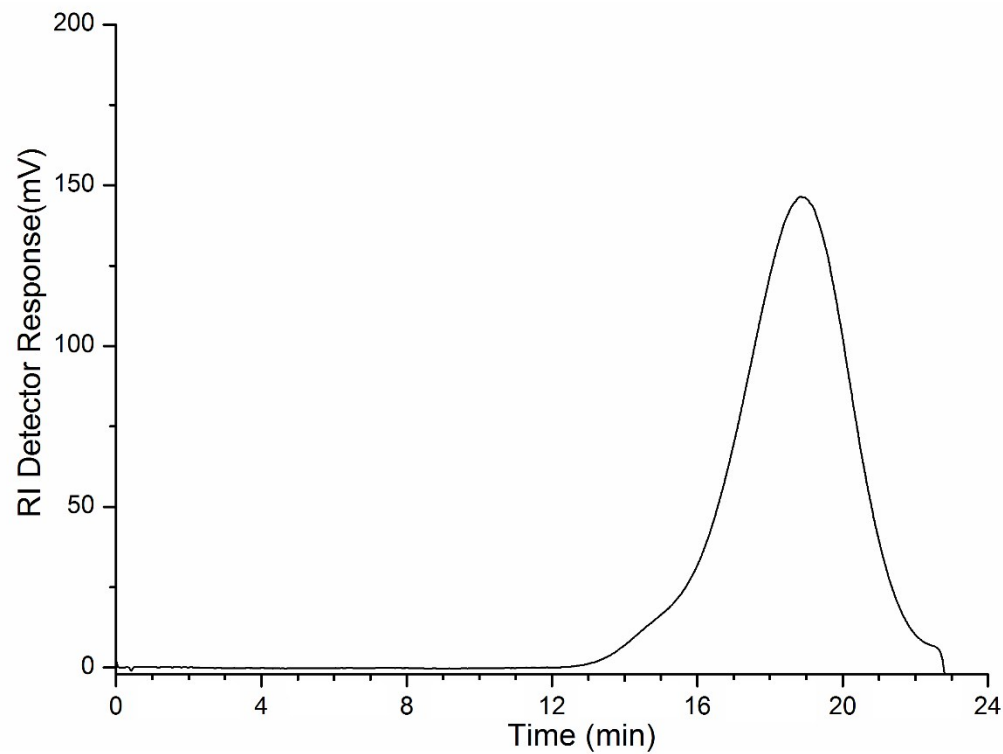

Supplementary Fig 1. HPSEC profile of purified fuc-*Pg*.

Supplementary Fig.2a

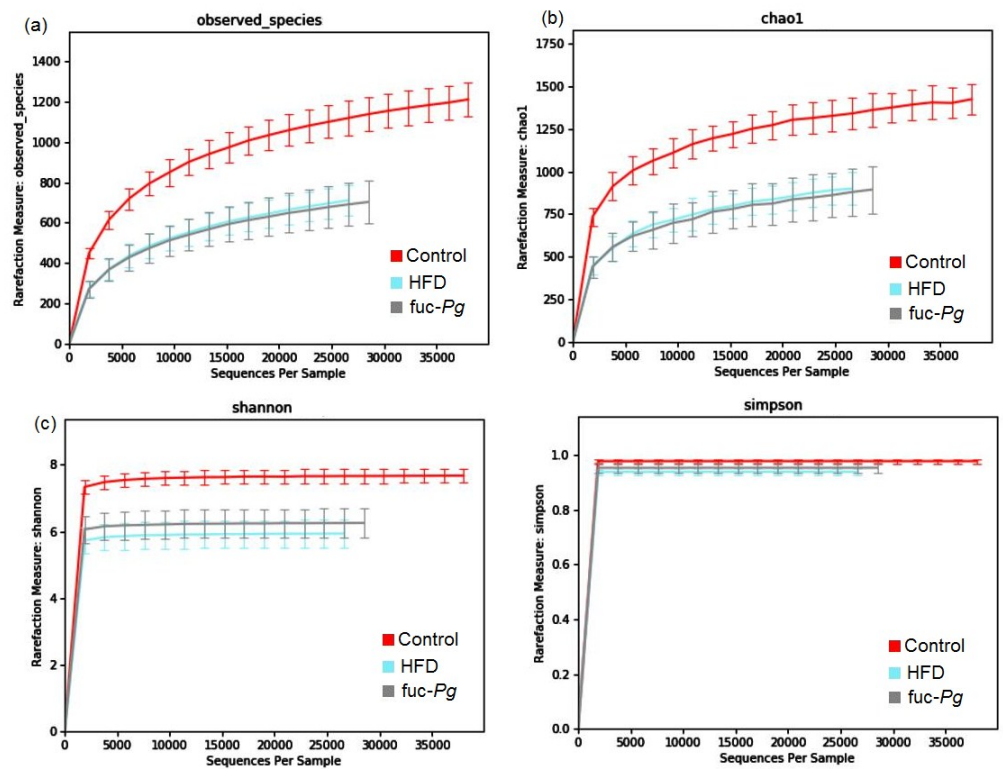

Supplementary Fig.2b

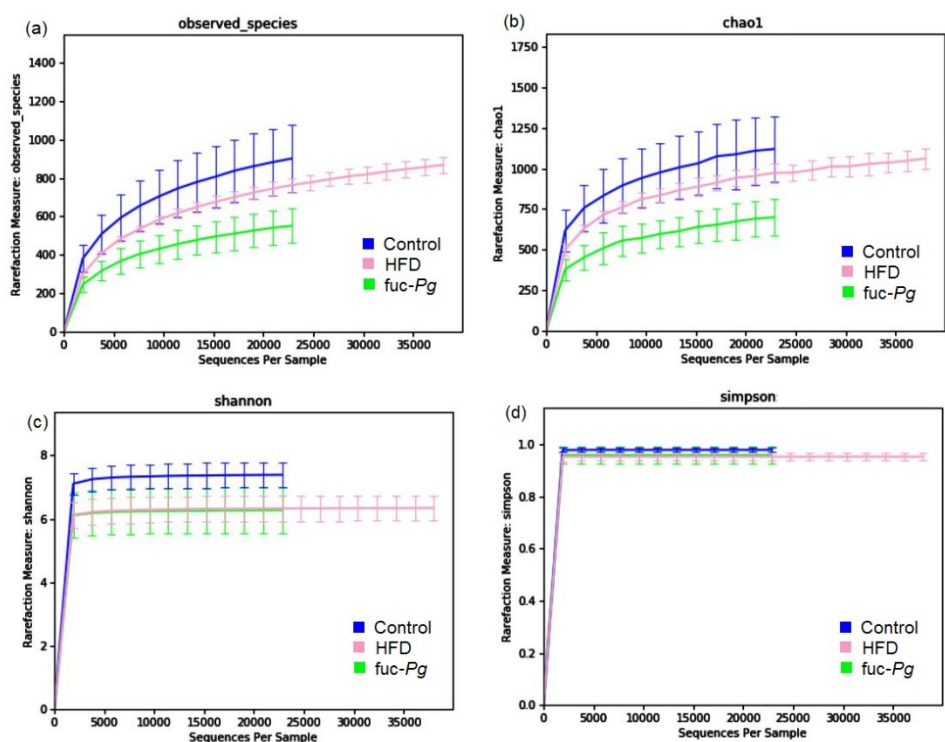

**Supplementary Figure.2a** Rarefaction curves of observed species, chao1, Shannon indices and Simpson indices in the cecal microbiota. **Supplementary Figure.2b** Rarefaction curves of observed species, chao1, Shannon indices and Simpson indices in the colonic microbiota.

Supplementary Fig.3a

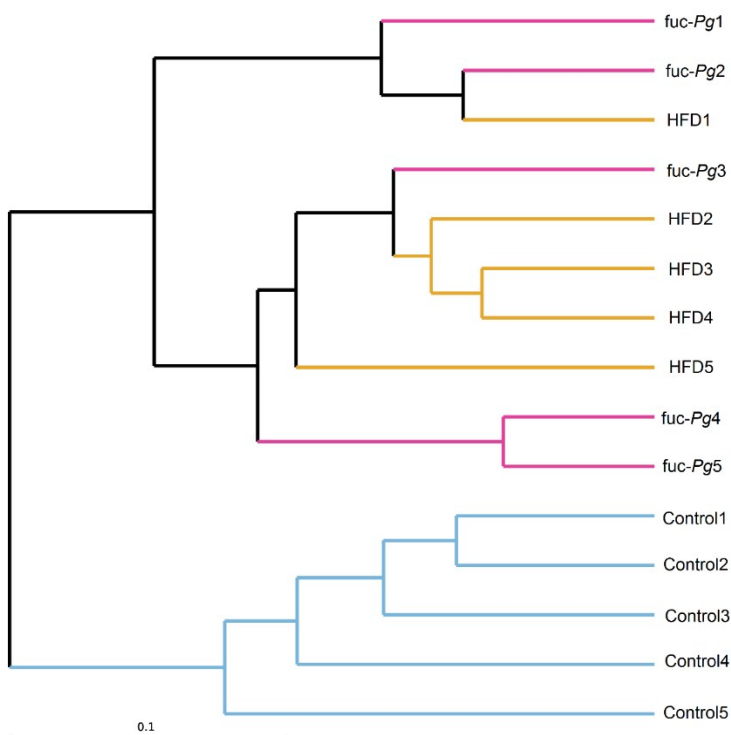

**Supplementary Fig.3c**

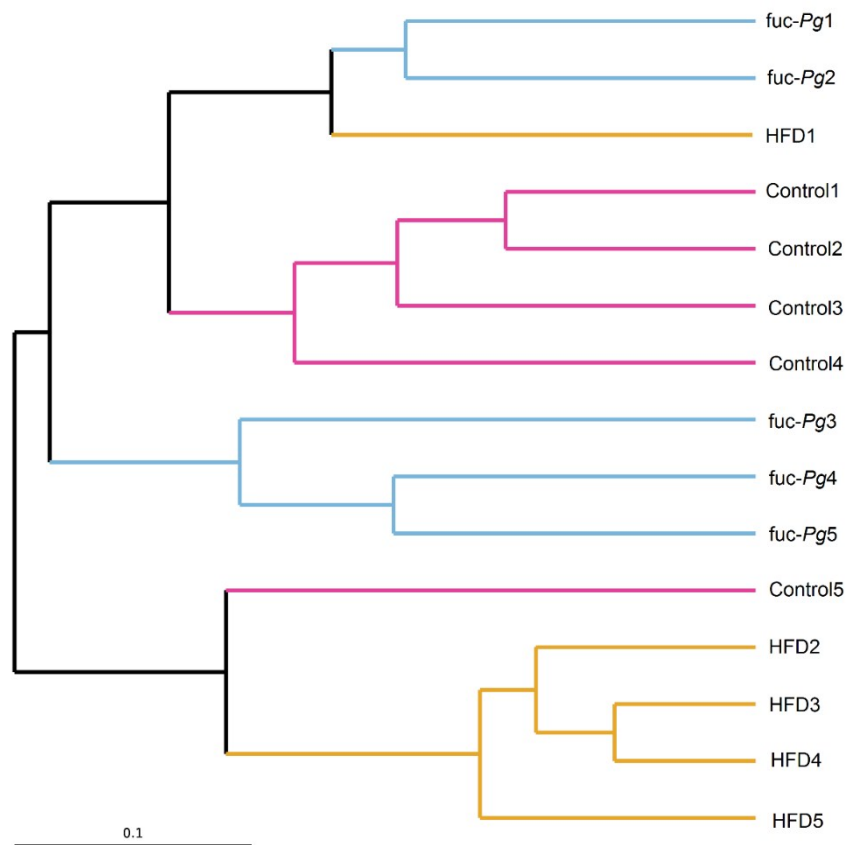

**Supplementary Figure.3** Unweighted Pair Group Method with Arithmetic Mean (UPGMA) cluster of cecal microbiota **(a)** and colonic microbiota **(b)** among the Control, HFD, and fuc-*Pg* groups.

**Supplementary Fig.4a**

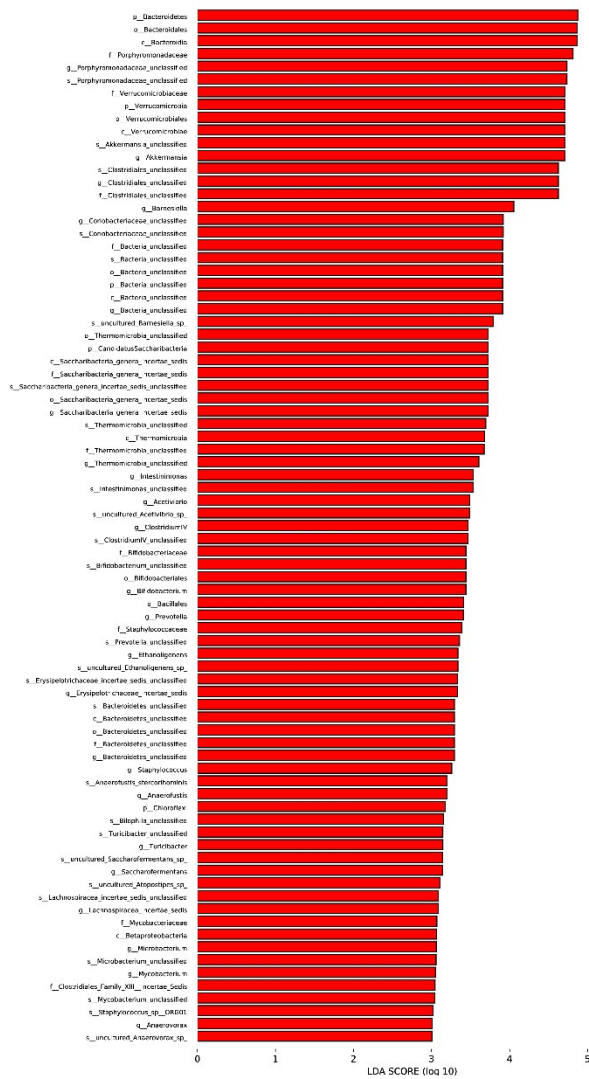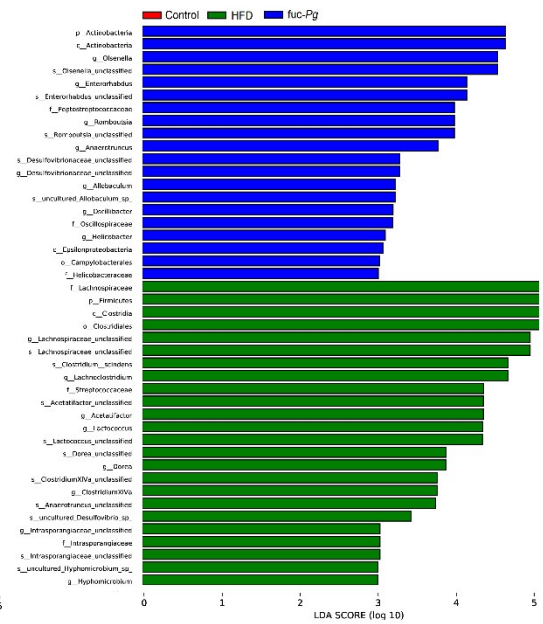

Supplementary Fig.4b

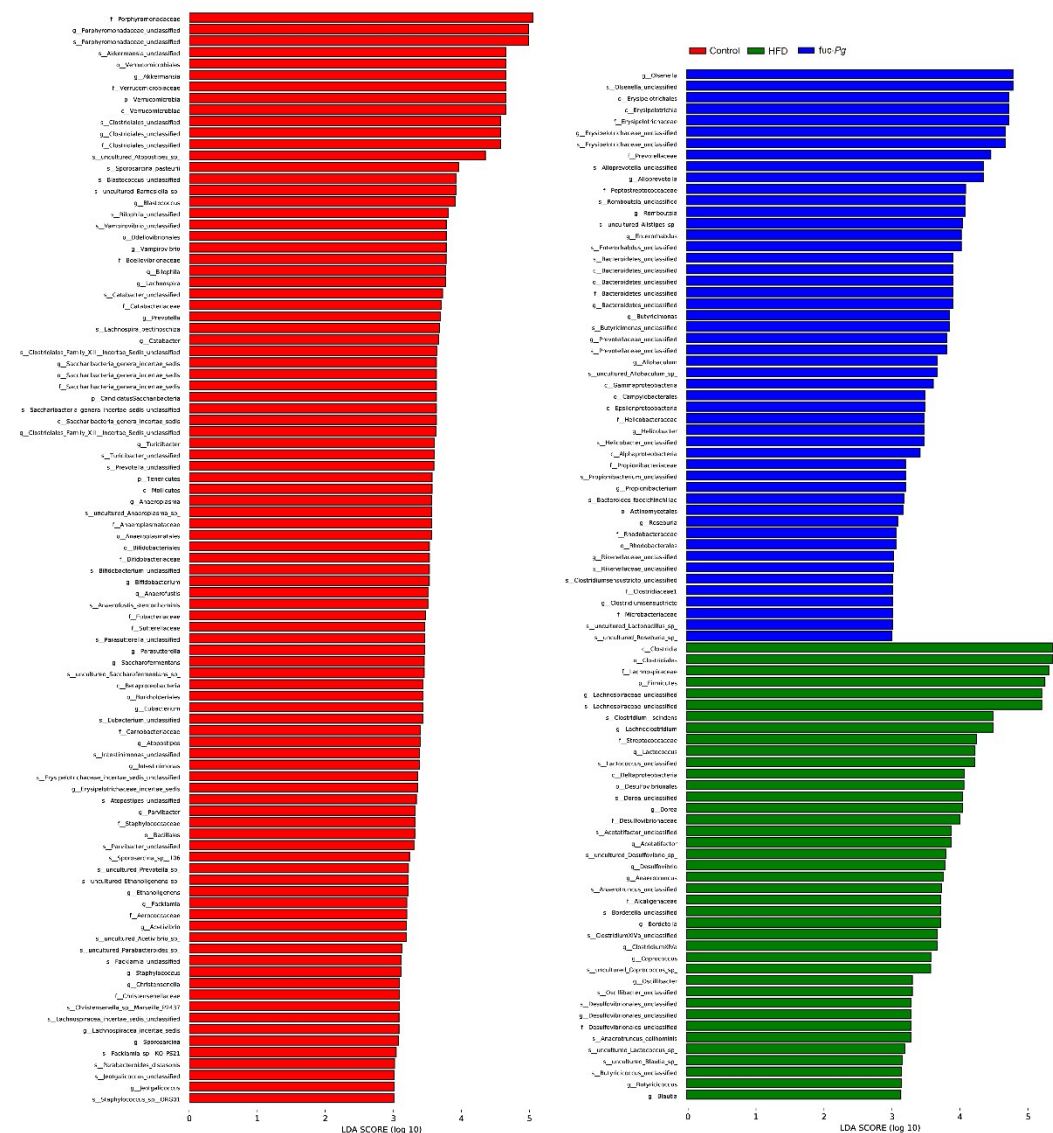

Supplementary Fig.4 LefSe comparison of gut microbiota. LDA score of cecal microbiota between the control, HFD and fuc-Pg group (a); LDA score of colonic microbiota between the control, HFD and fuc-Pg group (b). Only taxa meeting an LDA score threshold > 3 are listed.
